# Supplementary material for: Effects of vitamin D3 supplementation on strength of lower and upper extremities in athletes: an updated systematic review and meta-analysis of randomized controlled trials
Source: Frontiers journal article supplement (doi:10.3389/fnut.2024.1381301), 2024-05-27
Supplement: Image_1.pdf [file Image_1.pdf]

### **Search Methods for Identification of Articles**

An electronic literature search of the PubMed, EBSCO, and Cochrane Library databases from inception to September 27, 2023 was completed. Combinations of the following search terms and medical subject headings (MeSH) were used: vitamin D, 25-hydroxyvitamin D, 25(OH)D, cholecalciferol, calcidiol, 25-hydroxycholecalciferol, exercise, athletes, sports, athletic performance, physical fitness. The search results were merged and duplicates were removed and the searching strategy was as follows:

((("vitamin d"[MeSH Terms] OR "vitamin d"[All Fields] OR "ergocalciferols"[MeSH Terms] OR "ergocalciferols"[All Fields]) OR ("25-hydroxyvitamin D"[Supplementary Concept] OR "25-hydroxyvitamin D"[All Fields] OR "25 hydroxyvitamin d"[All Fields] OR "calcifediol"[MeSH Terms] OR "calcifediol"[All Fields]) OR 25[All Fields] AND ("hydroxide ion"[Supplementary Concept] OR "hydroxide ion"[All Fields] OR "oh"[All Fields]) AND D[All Fields] OR ("cholecalciferol"[MeSH Terms] OR "cholecalciferol"[All Fields]) OR ("calcifediol"[MeSH Terms] OR "calcifediol"[All Fields] OR "calcidiol"[All Fields]) OR ("calcifediol"[MeSH Terms] OR "calcifediol"[All Fields] OR "25 hydroxycholecalciferol"[All Fields])) AND (("exercise"[MeSH Terms] OR "exercise"[All Fields]) OR ("athletes"[MeSH Terms] OR "athletes"[All Fields] OR "athlete"[All Fields]) OR ("sports"[MeSH Terms] OR "sports"[All Fields] OR "athletic"[All Fields]) OR ("sports"[MeSH Terms] OR "sports"[All Fields]) OR ("physical fitness"[MeSH Terms] OR ("physical"[All Fields] AND "fitness"[All Fields]) OR "physical fitness"[All Fields]))

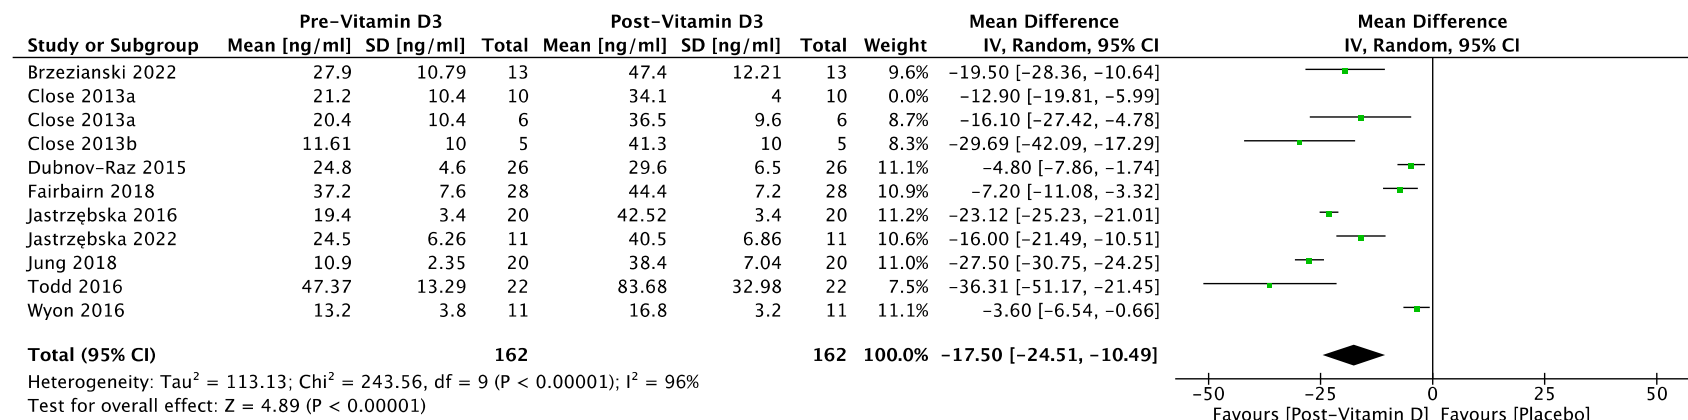

(A)

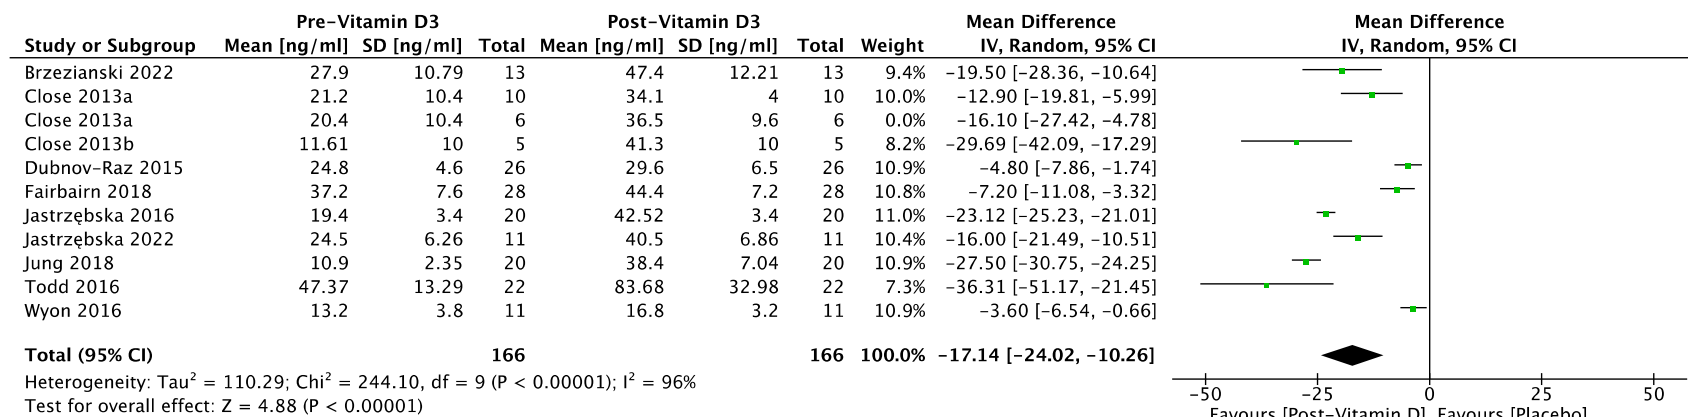

(B)

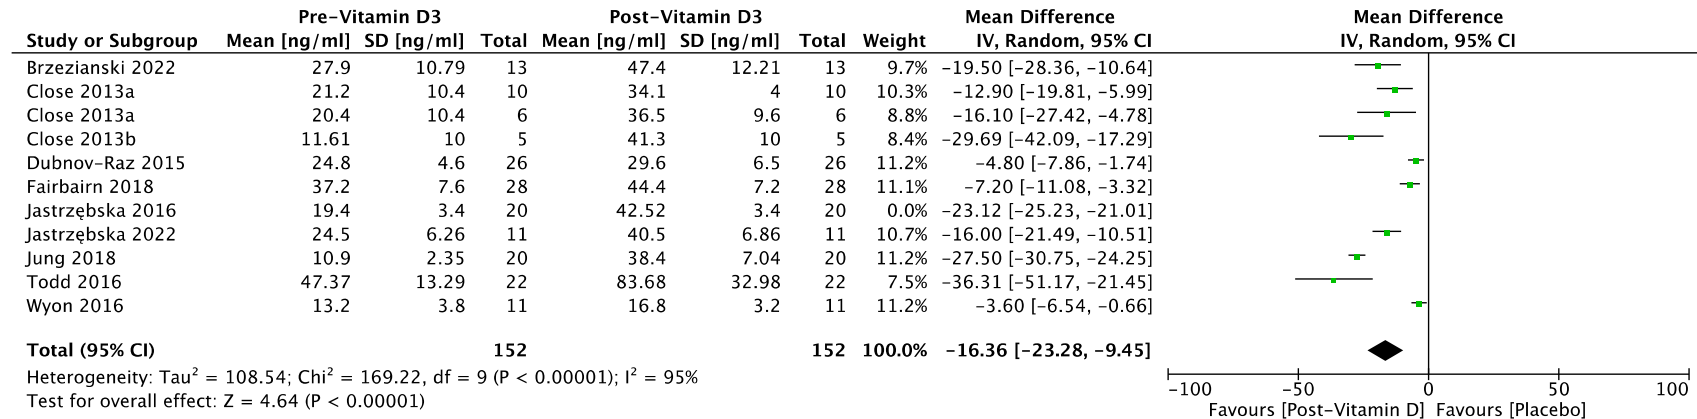

(C)

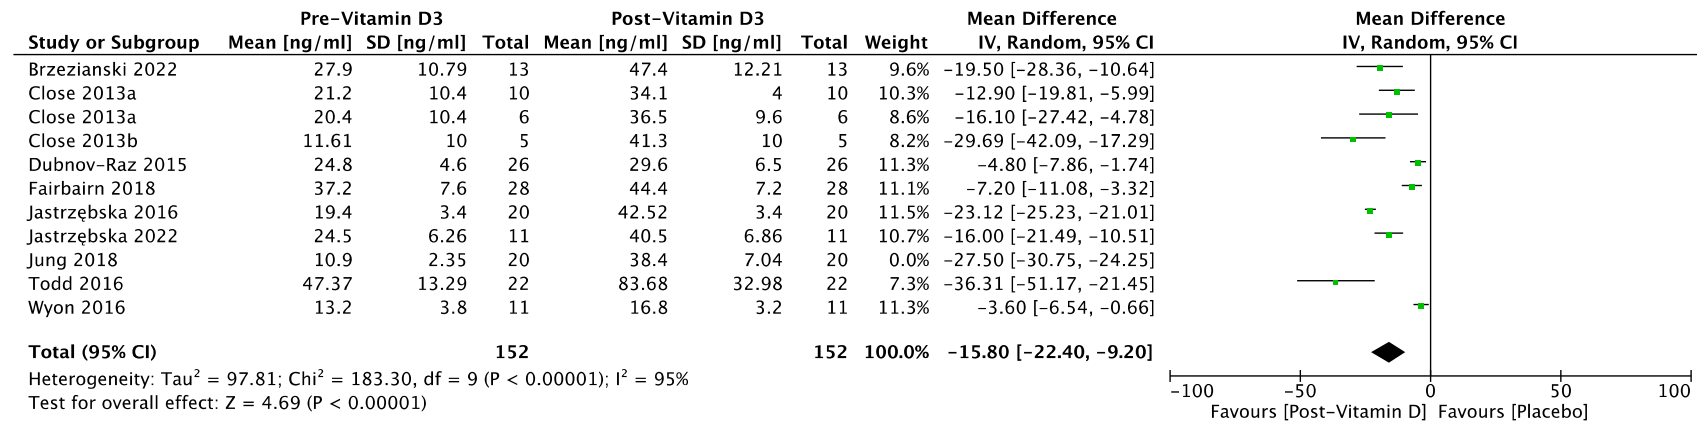

(D)

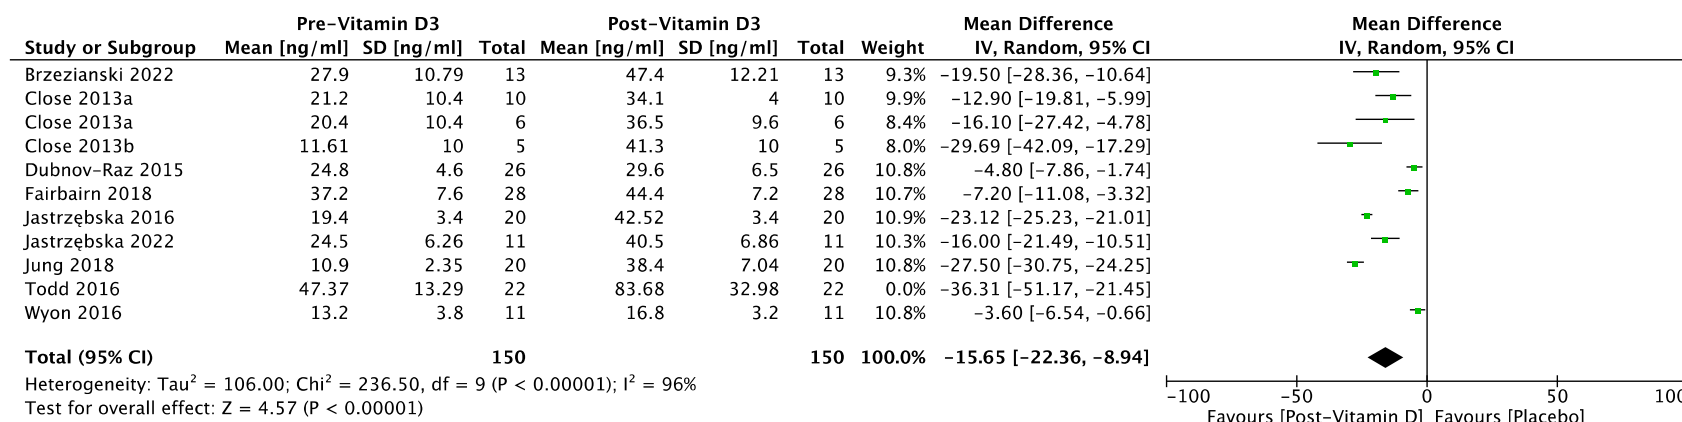

(E)

**Supplemental Figure 1** Forests plot displayed a meta-analysis examining the impact of vitamin D3 supplementation on serum 25-hydroxyvitamin D (25(OH)D) levels. Notably, this analysis involved the systematic exclusion of studies with a loss to follow-up exceeding 15%. The included studies are labeled as follows: A/B. Close 2013a, C. Jastrzębska 2022, D. Jung, and E. Todd 2018. Close 2013a obtain two different dosage intervention groups.
